# Supplementary material
Source: PubMed Central journal article supplement (PMC10592327)
Supplement: NIHMS1920161-supplement-Supinfo1.pdf [file NIHMS1920161-supplement-Supinfo1.pdf]

## Supplemental Figures

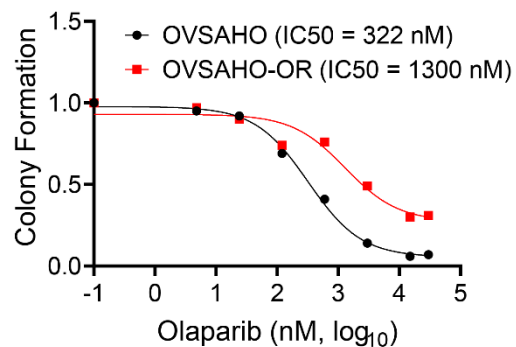

**Fig. S1. OVSAHO cells selected in olaparib exhibit increased olaparib IC<sub>50</sub> relative to the isogenic parental line.** OVSAHO cells were subjected to stepwise dose escalation of olaparib to select for resistant cells. Elevated olaparib IC<sub>50</sub> was confirmed in the olaparib-resistant (-OR) line by dose response colony formation assays. The proportion of colonies at each dose are shown relative to vehicle control. Olaparib IC<sub>50</sub> values were calculated in GraphPad Prism.

KEGG: Fanconi Anemia Pathway

Enrichment Score: 0.43

FDR q-value = 0.0056

KEGG: DNA Replication

Enrichment Score: 0.49

FDR q-value = 0.0016

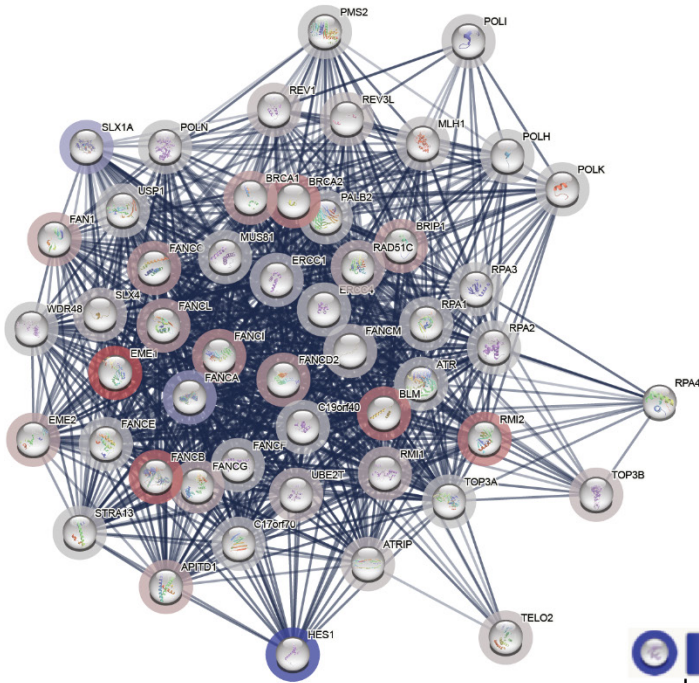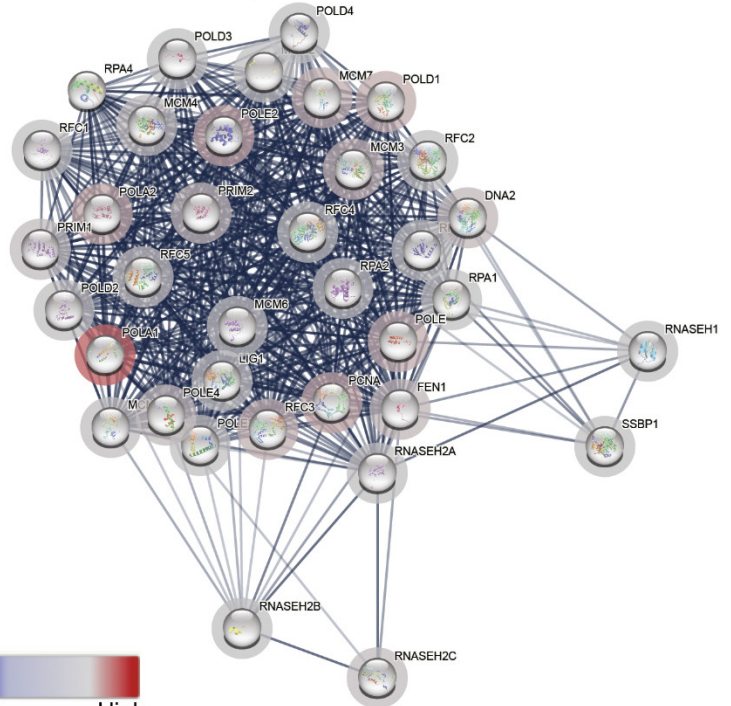

Low Gene expression High Gene expression  
Log2 Fold Change  
(OlaparibTreatment/Control Treatment)

Fig. S2. Diagram of altered expression of KEGG pathways in olaparib-treated PDX vs control.

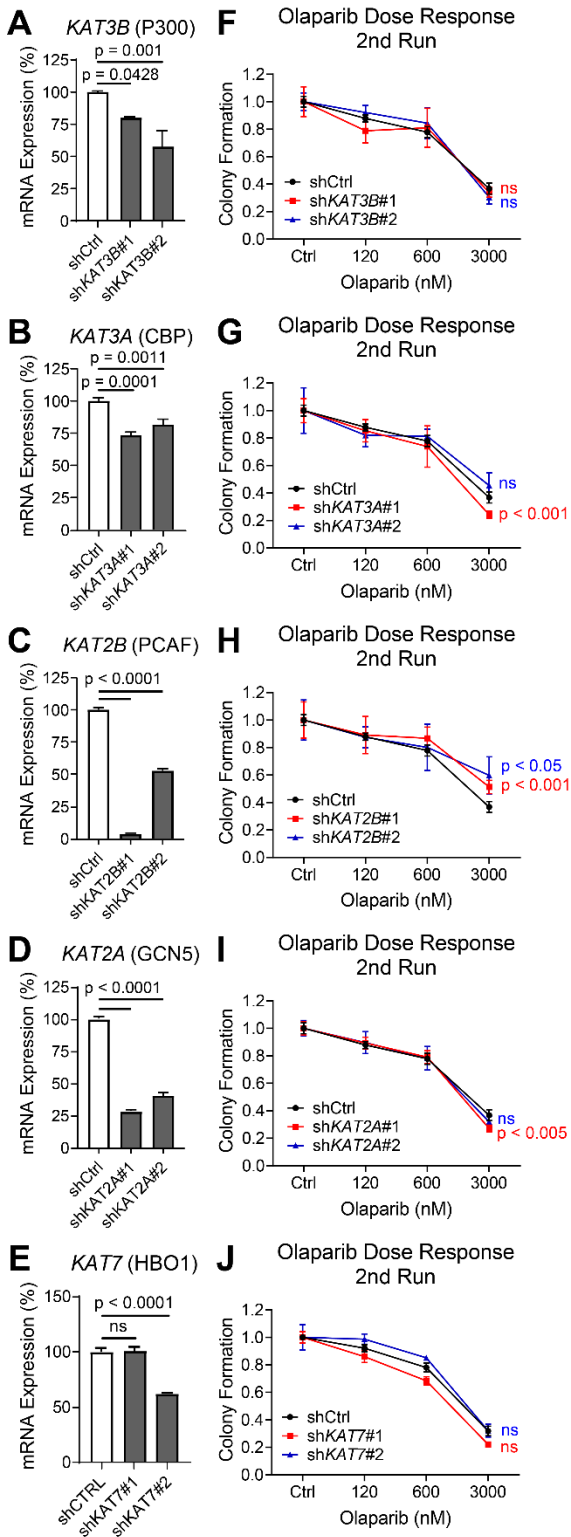

**Fig. S3. Knockdown of specific HATs in PEO1-OR HGSOC cells moderately affects olaparib response.**

(A-E) PEO1-OR cells were transduced with the indicated targeted shRNA or a non-targeting scrambled shRNA (shCTRL) and then selected in puromycin. The knockdown of each HAT was determined by RT-qPCR. mRNA expression was determined relative to *GAPDH* by  $\Delta\Delta C_t$  method, then normalized to shCTRL for each knockdown. Each bar represents the mean  $\pm$  SD of three PCR reactions. p-value by t-test. Corresponding

immunoblots are shown in the main text **Fig. 2. (F-J)** Each shRNA line was seeded at 2500 cells per well in a 24-well plate and treated with vehicle control or the indicated doses of olaparib for eight days, after which colonies were fixed and stained with crystal violet. Stain was dissolved and the absorbance from each well was read by spectrophotometer, then normalized to vehicle control. Colony formation at each dose is shown normalized to vehicle control. Each data point represents the mean  $\pm$  SD of six wells. p-value by t-test. ns = not significant.

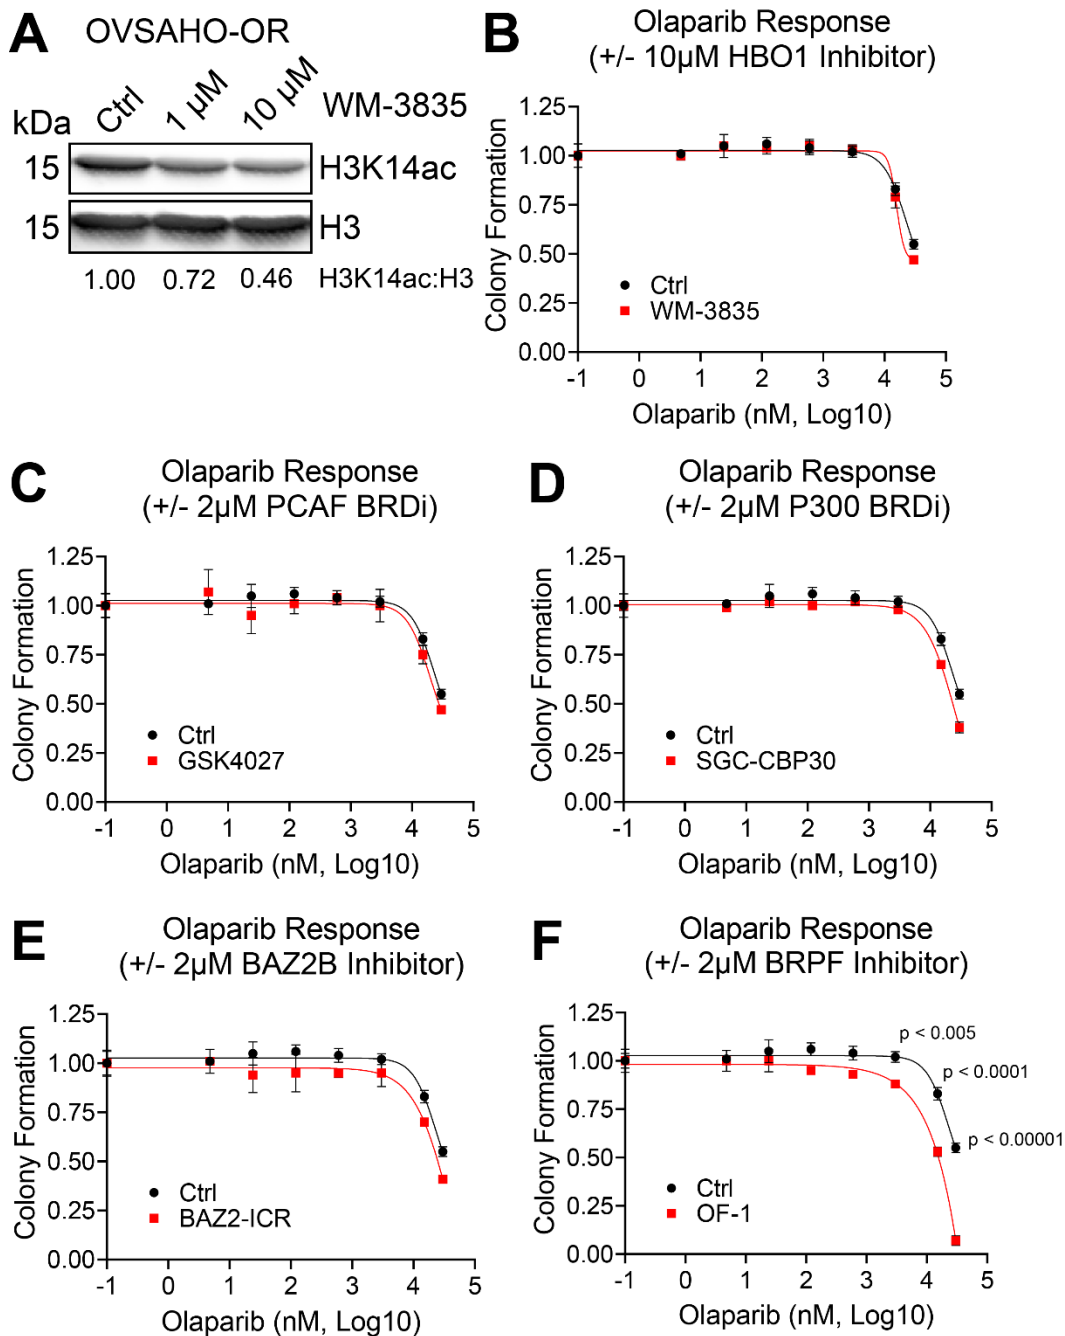

**Fig. S4. Pharmacologic depletion of H3K14ac does not shift PARPi response, but BRPF-family inhibitor OF-1 moderately improves olaparib response in OVSAHO-OR.** (A) OVSAHO-OR cells were treated with the indicated doses of HBO1 acetyltransferase inhibitor WM-3835 for 6 hours. Histone extracts were analyzed by immunoblot for H3K14ac and total H3. The H3K14ac:H3 ratio was calculated by densitometry to quantify H3K14ac depletion. (B) OVSAHO-OR were seeded at 7500 cells per well in a 96-well plate and treated with increasing doses of olaparib with or without 10  $\mu$ M WM-3835. After six days, the colonies were fixed and stained with crystal violet. Stain was dissolved and the absorbance from each well was read by spectrophotometer, then normalized to vehicle control. Error bars, SEM. Olaparib IC<sub>50</sub> for each treatment

condition was calculated in GraphPad Prism. **(C-F)** OVSAHO-OR cells in a 96-well plate were treated with increasing doses of olaparib with or without 2  $\mu$ M of the indicated BRD inhibitors. Colony formation and olaparib IC<sub>50</sub> were determined as described above. Error bars, SEM. p-value by t-test.

### Stage

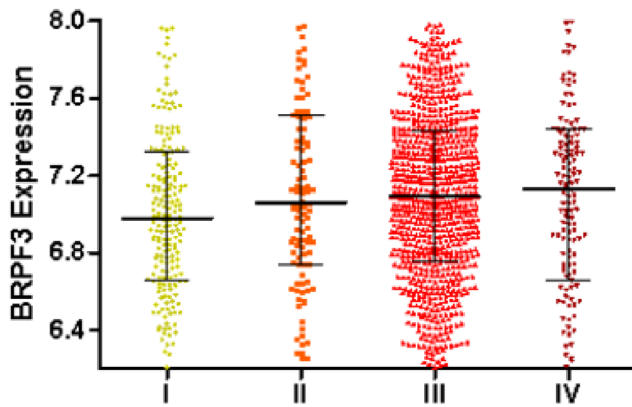

| Mann Whitney Test | I | II       | III      | IV       | Rest     |
|-------------------|---|----------|----------|----------|----------|
| I                 |   | 1.13e-01 | 9.70e-03 | 1.24e-01 | 1.65e-02 |
| II                |   |          | 9.50e-01 | 7.95e-01 | 6.39e-01 |
| III               |   |          |          | 8.57e-01 | 1.40e-01 |
| IV                |   |          |          |          | 8.10e-01 |

| Description\Stage | I     | II    | III   | IV    |
|-------------------|-------|-------|-------|-------|
| Mean              | 7.016 | 7.123 | 7.100 | 7.078 |
| Quantile 1        | 6.656 | 6.742 | 6.757 | 6.667 |
| Median            | 6.981 | 7.062 | 7.090 | 7.128 |
| Quantile 4        | 7.324 | 7.513 | 7.436 | 7.440 |

### Grade

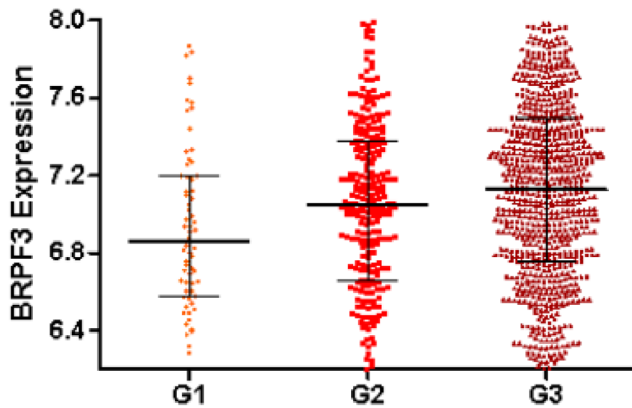

| Mann Whitney Test | Grade 1 | Grade 2  | Grade 3  | Rest     |
|-------------------|---------|----------|----------|----------|
| Grade 1           |         | 5.07e-02 | 7.20e-04 | 3.76e-03 |
| Grade 2           |         |          | 1.13e-02 | 1.45e-01 |
| Grade 3           |         |          |          | 5.62e-04 |

| Description\Grade | Grade 1 | Grade 2 | Grade 3 |
|-------------------|---------|---------|---------|
| Mean              | 6.942   | 7.021   | 7.134   |
| Quantile 1        | 6.576   | 6.662   | 6.754   |
| Median            | 6.881   | 7.048   | 7.130   |
| Quantile 4        | 7.196   | 7.375   | 7.493   |

**Fig. S5. BRPF3 expression is positively correlated with higher HGSOC stage and grade. A meta-analysis of HGSOC microarray data was performed using CSIOVDB.**

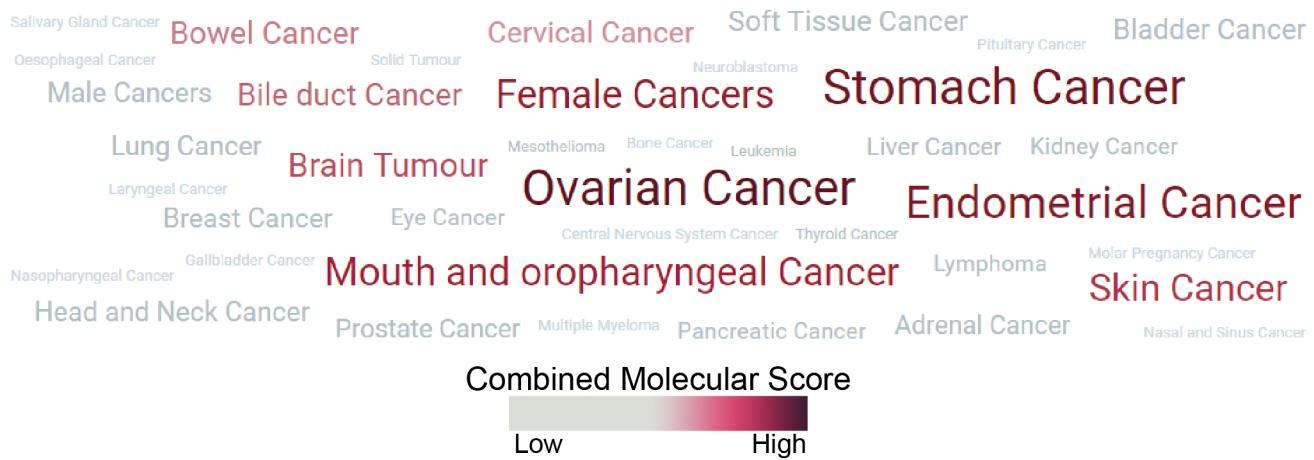

**Fig. S6. BRPF3 is significantly associated with ovarian cancer in combined molecular score.** Word cloud generated by canSAR Black by meta-analysis of cancer datasets. Combined molecular score includes mutation score, gene expression, and copy number variation.



## A PEO1-OR Olaparib Response

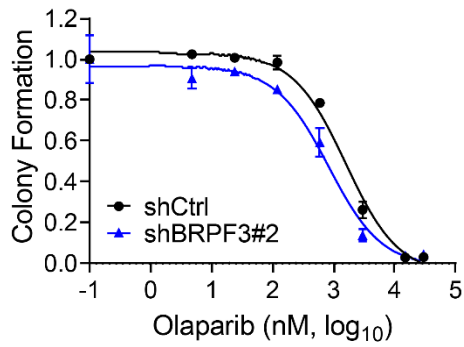

**Fig. S7. shRNA-mediated knockdown of *BRPF3* sensitizes PEO1-OR cells to olaparib.** PEO1-OR stably expressing the indicated shRNA were seeded at 2500 cells per well in a 24-well plate and treated with increasing doses of olaparib. Media and drug were changed every 2-3 days for eight days, after which colonies were fixed and stained with crystal violet. Stain was dissolved and the absorbance from each well was read by spectrophotometer, then normalized to vehicle control. Error bars, SEM. Olaparib IC<sub>50</sub> for each treatment condition was calculated in GraphPad Prism.

## Supplemental Tables

| Gene<br>(Protein)       | TPM<br>(834 Ctrl) | TPM<br>(846 Ctrl) | TPM<br>(827 Olap) | TPM<br>(878 Olap) | logFC  | P-value  | FDR   |
|-------------------------|-------------------|-------------------|-------------------|-------------------|--------|----------|-------|
| <i>KAT2A</i><br>(GCN5)  | 6.35              | 5.98              | 15.09             | 13.61             | 1.093  | 5.11E-05 | 0.003 |
| <i>KAT2B</i><br>(PCAF)  | 4.92              | 3.93              | 3.63              | 4.62              | -0.149 | 0.593    | 1.000 |
| <i>KAT3A</i><br>(CBP)   | 8.66              | 10.12             | 13.46             | 13.13             | 0.532  | 0.041    | 0.363 |
| <i>KAT3B</i><br>(P300)  | 10.85             | 15.09             | 12.62             | 14.84             | 0.236  | 0.369    | 1.000 |
| <i>KAT7</i><br>(HBO1)   | 7.42              | 6.56              | 6.88              | 9.45              | 0.185  | 0.497    | 1.000 |
| <i>BRPF3</i><br>(BRPF3) | 5                 | 6.15              | 8.21              | 8.96              | 0.642  | 0.019    | 0.234 |

**Table S1. RNA-Seq analysis of PDX-GTFB1009 olaparib-treated and -untreated ascites.** For each of the indicated genes, the transcripts per million (TPM) are shown for the four indicated mice, as well as log fold change (logFC), P-value, and false discovery rate (FDR).

| KEGG Pathway                                | # Genes Mapped | Enrichment Score | Direction | FDR (q-value) |
|---------------------------------------------|----------------|------------------|-----------|---------------|
| Neuroactive ligand-receptor interaction     | 138            | 0.992824         | Both      | 2.11E-11      |
| Ribosome                                    | 128            | 0.446269         | Inhibited | 6.06E-10      |
| Cytokine-cytokine receptor interaction      | 147            | 0.5105           | Both      | 2.64E-07      |
| Protein digestion and absorption            | 66             | 0.734508         | Both      | 0.0002        |
| Proteoglycans in cancer                     | 175            | 0.376922         | Inhibited | 0.00057       |
| Viral protein interaction with cytokine and | 47             | 0.780212         | Inhibited | 0.00069       |
| HIF-1 signaling pathway                     | 89             | 0.544794         | Inhibited | 0.0011        |
| Cell cycle                                  | 118            | 0.293541         | Activated | 0.0012        |
| TNF signaling pathway                       | 103            | 0.433002         | Inhibited | 0.0012        |
| Kaposi sarcoma-associated herpesvirus       | 158            | 0.280737         | Inhibited | 0.0012        |
| Inflammatory bowel disease                  | 39             | 0.828738         | Inhibited | 0.0012        |
| Th1 and Th2 cell differentiation            | 74             | 0.472015         | Inhibited | 0.0013        |
| DNA replication                             | 35             | 0.494633         | Activated | 0.0016        |
| Autophagy - animal                          | 127            | 0.243375         | Inhibited | 0.0016        |
| Ferroptosis                                 | 36             | 0.748789         | Inhibited | 0.0018        |
| Salmonella infection                        | 195            | 0.297563         | Inhibited | 0.0018        |
| Mitophagy - animal                          | 63             | 0.41506          | Inhibited | 0.0024        |
| Yersinia infection                          | 115            | 0.424649         | Inhibited | 0.0035        |
| Renal cell carcinoma                        | 64             | 0.379247         | Inhibited | 0.0037        |
| B cell receptor signaling pathway           | 61             | 0.470524         | Inhibited | 0.0048        |
| C-type lectin receptor signaling pathway    | 84             | 0.247104         | Inhibited | 0.0053        |
| Staphylococcus aureus infection             | 40             | 0.688738         | Inhibited | 0.0053        |
| Insulin resistance                          | 97             | 0.320517         | Inhibited | 0.0054        |
| Fanconi anemia pathway                      | 50             | 0.43917          | Activated | 0.0056        |
| Sphingolipid signaling pathway              | 108            | 0.210381         | Inhibited | 0.0089        |
| Systemic lupus erythematosus                | 57             | 0.773827         | Activated | 0.009         |
| Type I diabetes mellitus                    | 23             | 0.794405         | Inhibited | 0.0097        |

**Table S2. Olaparib-resistant PDX exhibit altered KEGG pathways, including activated Cell Cycle, DNA Replication, and Fanconi Anemia.**

| <b>shRNA</b> | <b>The RNAi Consortium Number</b> | <b>Target Sequence</b> |
|--------------|-----------------------------------|------------------------|
| shCTRL       | N/A (Sigma-Aldrich #SHC016)       | N/A                    |
| shKAT2A#1    | TRCN0000038879                    | GCTGAACTTTGTGCAGTACAA  |
| shKAT2A#2    | TRCN0000286981                    | GCTGAACTTTGTGCAGTACAA  |
| shKAT2B#1    | TRCN0000018528                    | GCAGACTTACAGCGAGTCTTT  |
| shKAT2B#2    | TRCN0000364134                    | CCTAAACCGCATCAACTATTG  |
| shKAT3A#1    | TRCN0000356081                    | ATCGCCACGTCCCTTAGTAAC  |
| shKAT3A#2    | TRCN0000356082                    | CGTTTACCATGAGATCCTTAT  |
| shKAT3B#1    | TRCN0000231133                    | TAACCAATGGTGGTGATATTA  |
| shKAT3B#2    | TRCN0000009883                    | CAATTCCGAGACATCTTGAGA  |
| shKAT7#1     | TRCN0000021630                    | CGGGATAAGCAGATAGAAGAA  |
| shKAT7#2     | TRCN0000021632                    | CTCGTTCATCTGGTTCAGAAA  |
| shBRPF3#1    | TRCN0000382105                    | AGGAGGACTTTAACCTTATAG  |
| shBRPF3#2    | TRCN0000277697                    | TCACACTCTCTCCCGCTTATC  |

**Table S3. shRNA**

| <b>Name</b>  | <b>Sequence</b>        | <b>Usage</b>                 |
|--------------|------------------------|------------------------------|
| GAPDH_F      | GTCTCCTCTGACTTCAACAGCG | Control ( $\Delta\Delta$ Ct) |
| GAPDH_R      | ACCACCCTGTTGCTGTAGCCAA | Control ( $\Delta\Delta$ Ct) |
| KAT2A_GCN5_F | GCAGGTCAAGGGTTATGGGAC  | Gene expression              |
| KAT2A_GCN5_R | GCTCTTGGGCACCTTGATGT   | Gene expression              |
| KAT2B_PCAF_F | GGTGAAGAGCCATCAAAGCG   | Gene expression              |
| KAT2B_PCAF_R | GACTCGCTGTAAGTCTGCCA   | Gene expression              |
| KAT3A_CBP_F  | GGCCTTCAGGTTTTGTGTGC   | Gene expression              |
| KAT3A_CBP_R  | TTCCAGTCTTGTGGTCTGC    | Gene expression              |
| KAT3B_P300_F | TGCCAAACCAGATGATGCCT   | Gene expression              |
| KAT3B_P300_R | ATAGCCCATAGGCGGGTTGA   | Gene expression              |
| KAT7_HBO1_F  | CACCAACGGAGAGACAGCTT   | Gene expression              |
| KAT7_HBO1_R  | GCAGCCTTAACTTCTCAAATCC | Gene expression              |
| BRPF3_F      | CCCATCTGCAGTCCCAAAGA   | Gene expression              |
| BRPF3_R      | GGACTTTGACCTGCTCTCGTT  | Gene expression              |

**Table S4. RT-qPCR Primers**

| <b>Protein</b> | <b>Supplier &amp; Catalog #</b> | <b>Species</b> | <b>RRID</b> | <b>Dilution</b> |
|----------------|---------------------------------|----------------|-------------|-----------------|
| β-actin        | Abcam #ab6276                   | Mouse          | AB_2223210  | 1:10,000        |
| BRPF3          | Abcam #ab69410                  | Mouse          | AB_1209613  | 1:1000          |
| CBP            | Cell Signaling #7389            | Rabbit         | AB_2616020  | 1:1000          |
| GCN5           | Cell Signaling #3305            | Rabbit         | AB_2128281  | 1:1000          |
| H3             | Cell Signaling #14269           | Mouse          | AB_2756816  | 1:1000          |
| H3K14ac        | Cell Signaling #7627            | Rabbit         | AB_10839410 | 1:1000          |
| HBO1           | Cell Signaling #58418           | Rabbit         | AB_2799547  | 1:1000          |
| P300           | Abcam #ab14984                  | Mouse          | AB_301550   | 1:350           |
| PCAF           | Cell Signaling #3378            | Rabbit         | AB_2128409  | 1:1000          |

**Table S5. Immunoblotting Antibodies**
